# Supplementary material for: Probing Iceland's dust-emitting sediments: particle size distribution, mineralogy, cohesion, Fe mode of occurrence, and reflectance spectra signatures
Source: Copernicus journal article supplement (doi:10.5194/acp-24-6883-2024), 2024-06-14
Supplement: Supplementary file 1 [file acp-24-6883-2024-supplement.pdf]

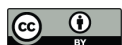

*Supplement of*

**Probing Iceland's dust-emitting sediments: particle size distribution, mineralogy, cohesion, Fe mode of occurrence, and reflectance spectra signatures**

**Adolfo González-Romero et al.**

*Correspondence to:* Adolfo González-Romero (agonzal3@bsc.es) and Xavier Querol (xavier.querol@idaea.csic.es)

The copyright of individual parts of the supplement might differ from the article licence.

1

## Supplementary material

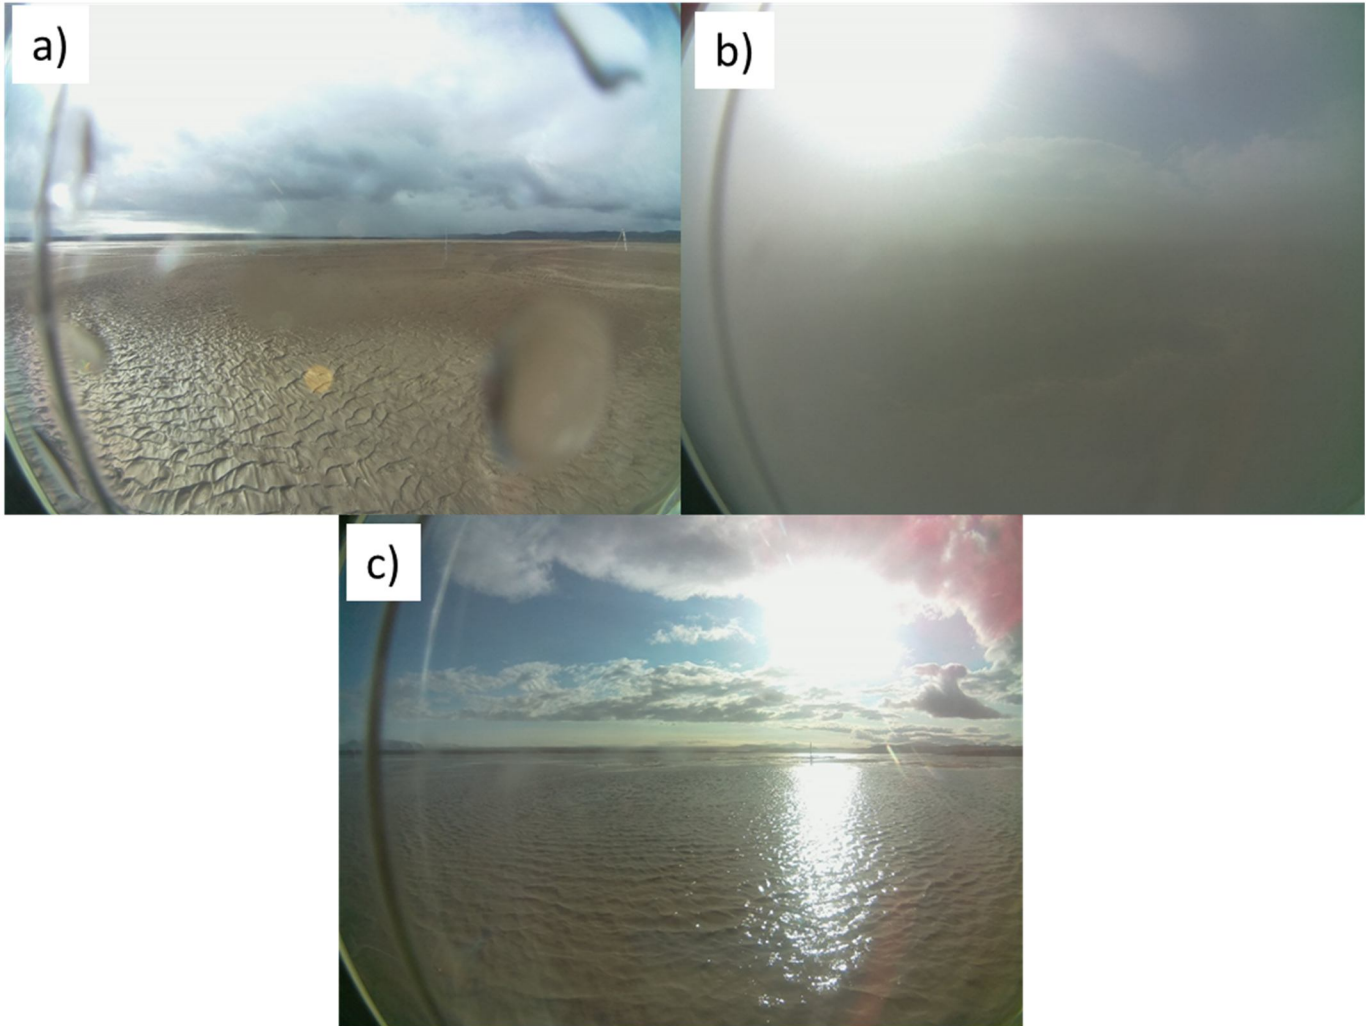

2  
3  
4  
5  
6  
7

**Figure S1.** Examples of different events in the main site with a) rain and flooding in the distance, b) dust event and c) flooding in the main site.

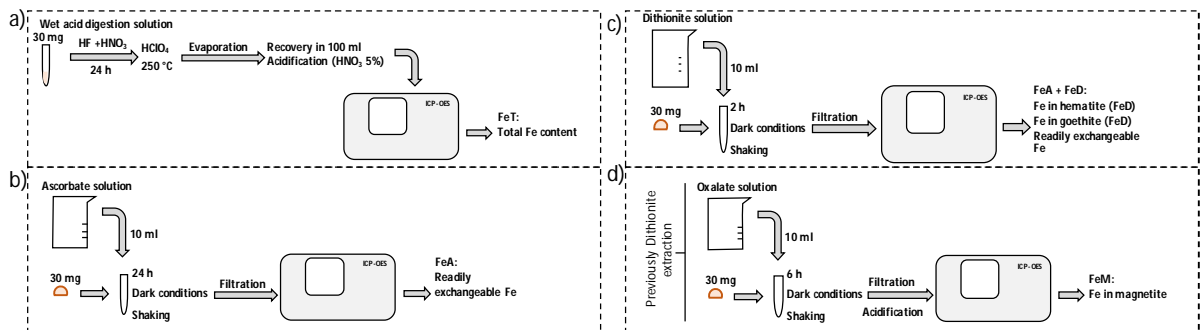

8  
9  
10  
11

**Figure S2.** Sequential extractions of Fe including a) total Fe content, b) ascorbic acid extraction, c) dithionite extraction and d) Oxalic extraction.

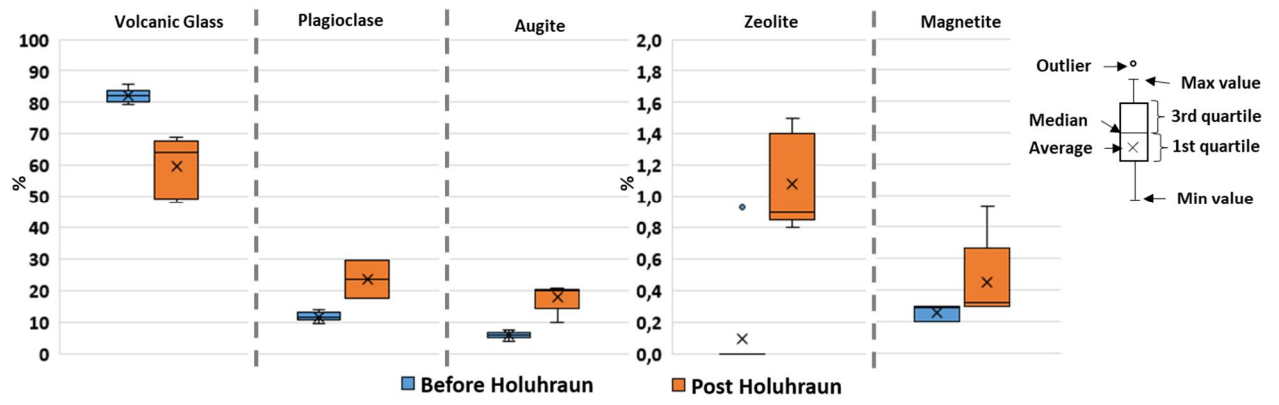

**Figure S3.** Weight in mass % contents of volcanic glass and crystalline mineral species in crust samples from the Jökulsá á Fjöllum basin pre- and post-Holuhraun field lava (natural dam).

12  
13  
14  
15  
16  
17  
18  
19  
20  
21  
22  
23  
24  
25  
26  
27  
28  
29  
30  
31  
32  
33  
34  
35  
36

37 **Table S1.** Wavelengths used in calculation of band depths for spectral features used to analyze visible-shortwave  
38 infrared spectra measured in the field, using formula  $1-R/R_c$ , where R is the reflectance value at the center  
39 wavelength and  $R_c$  is the value of a continuum at the center wavelength calculated as a straight line between  
40 the given points. All values used in the calculations are the mean of five consecutive bands centered around the  
41 given wavelength.

| Band depth | Center wavelength (nm) | Left continuum (nm) | Right continuum (nm) | Description                                   |
|------------|------------------------|---------------------|----------------------|-----------------------------------------------|
| BD1035     | 1035                   | 710                 | 1575                 | Electronic transition due to Fe <sup>2+</sup> |
| BD1920     | 1920                   | 1840                | 2140                 | H <sub>2</sub> O combination band             |
| BD2210     | 2210                   | 2150                | 2345                 | Si-OH or Al-OH combination band               |

42

43

44 **Table S2.** Mineral contents (%wt) of samples from the Jökulsá á Fjöllum basin. *R.S.C is the Random Sampling*  
 45 *Composite sample, obtained after mixing an equal batch of each type of sample.* The contents are in % of mass.  
 46 V. G.: volcanic glass, An: anorthite, And: andesine, Agt: augite, Mag: magnetite, M-Ca: mordenite-Ca, Anl:  
 47 analcime. C: crust, S: underlying fluvial sediment, R: eolian ripple, Av.C: Average of the crusts, Av.S: Average of  
 48 the fluvial sediments, Av.R: Average of the Ripples.

| Latitude | Longitude | Sample number | Type | Plagioclase |      |      | Pyroxene | Zeolites |      |      | Distance to Glacier (km) |
|----------|-----------|---------------|------|-------------|------|------|----------|----------|------|------|--------------------------|
|          |           |               |      | V. G.       | An   | And  |          | Agt      | Mag  | M-Ca |                          |
| 64,91    | -16,78    | 1             | C    | 79          | 13   | <0.1 | 7.4      | <0.5     | <0.1 | <0.1 | 16.0                     |
| 64,91    | -16,78    | 2             | C    | 86          | 9.8  | <0.1 | 4.0      | <0.5     | <0.1 | <0.1 | 15.5                     |
| 64,84    | -16,98    | 9             | C    | 83          | 11   | <0.1 | 5.4      | <0.5     | <0.1 | <0.1 | 2.0                      |
| 64,89    | -16,88    | 12            | C    | 83          | 11   | <0.1 | 5.8      | <0.5     | <0.1 | <0.1 | 9.5                      |
| 64,91    | -16,83    | 14            | C    | 85          | 9.6  | <0.1 | 5.5      | <0.5     | <0.1 | <0.1 | 13.0                     |
| 64,91    | -16,77    | 15            | C    | 83          | 12   | <0.1 | 5.0      | <0.5     | <0.1 | <0.1 | 16.0                     |
| 65,23    | -16,19    | 26            | C    | 69          | 18   | <0.1 | 9.9      | 0.93     | <0.1 | 0.90 | 72.5                     |
| 65,26    | -16,12    | 27            | C    | 48          | 30   | <0.1 | 21       | <0.5     | <0.1 | 0.90 | 76.5                     |
| 64,91    | -16,77    | 29            | C    | 80          | 13   | <0.1 | 6.0      | <0.5     | <0.1 | <0.1 | 15.5                     |
| 64,91    | -16,77    | 30            | C    | 79          | 14   | <0.1 | 6.6      | <0.5     | <0.1 | <0.1 | 15.5                     |
| 64,91    | -16,77    | 31            | C    | 82          | 11   | <0.1 | 6.7      | <0.5     | <0.1 | <0.1 | 15.5                     |
| 66,03    | -16,44    | 109           | C    | 64          | <0.1 | 14   | 20       | <0.5     | 0.80 | <0.1 | 176.0                    |
| 66,09    | -16,48    | 110           | C    | 66          | <0.1 | 13   | 19       | <0.5     | 1.0  | 0.50 | 183.0                    |
| 66,18    | -16,51    | 111           | C    | 51          | <0.1 | 28   | 20       | <0.5     | 0.60 | 0.70 | 194.0                    |
| 64,92    | -16,78    | R.S.C         | C    | 82          | 12   | <0.1 | 5.9      | <0.5     | <0.1 | 0.93 | 15.5                     |
| 64,91    | -16,78    | 3             | S    | 83          | 11   | <0.1 | 5.4      | <0.5     | <0.1 | <0.1 | 15.5                     |
| 64,89    | -16,88    | 13            | S    | 88          | 7.4  | <0.1 | 4.0      | <0.5     | <0.1 | <0.1 | 9.5                      |
| 64,91    | -16,77    | 16            | S    | 89          | 7.7  | <0.1 | 3.5      | <0.5     | <0.1 | <0.1 | 16.0                     |
| 65,23    | -16,19    | 25            | S    | 76          | 16   | <0.1 | 7.3      | 0.60     | <0.1 | <0.1 | 72.5                     |
| 65,26    | -16,12    | 28            | S    | 51          | 31   | <0.1 | 16       | <0.5     | <0.1 | 1.0  | 77.5                     |
| 64,91    | -16,77    | 32            | S    | 83          | 11   | <0.1 | 6.2      | <0.5     | <0.1 | <0.1 | 16.0                     |
| 64,91    | -16,77    | 33            | S    | 84          | 10   | <0.1 | 5.4      | <0.5     | <0.1 | <0.1 | 16.0                     |
| 64,92    | -16,78    | R.S.C         | S    | 85          | 9.6  | <0.1 | 4.9      | <0.5     | <0.1 | 0.84 | 15.5                     |
| 64,83    | -17,01    | 4             | R    | 90          | 6.4  | <0.1 | 3.4      | <0.5     | <0.1 | <0.1 | 1.0                      |

|       |        |    |       |            |             |             |             |      |               |               |      |
|-------|--------|----|-------|------------|-------------|-------------|-------------|------|---------------|---------------|------|
| 64,83 | -17,01 | 6  | R     | 90         | 6.6         | <0.1        | 3.5         | <0.5 | <0.1          | <0.1          | 1.0  |
| 64,84 | -16,98 | 10 | R     | 88         | 8.7         | <0.1        | 3.6         | <0.5 | <0.1          | <0.1          | 2.0  |
| 64,86 | -16,95 | 11 | R     | 89         | 8.3         | <0.1        | 3.5         | <0.5 | <0.1          | <0.1          | 4.5  |
| 64,91 | -16,77 | 17 | R     | 85         | 10          | <0.1        | 4.5         | <0.5 | <0.1          | <0.1          | 16.0 |
| 64,92 | -16,76 | 18 | R     | 82         | 11          | <0.1        | 6.4         | <0.5 | <0.1          | <0.1          | 16.0 |
| 64,95 | -16,55 | 19 | R     | 76         | 16          | <0.1        | 8.0         | <0.5 | <0.1          | <0.1          | 27.0 |
| 64,91 | -16,77 | 34 | R     | 85         | 10          | <0.1        | 5.3         | <0.5 | <0.1          | <0.1          | 16.0 |
|       |        |    | Av.C. | 75±<br>12  | 11±<br>7.4  | 3.6±8<br>.1 | 9.9±<br>6.4 | <0.5 | 0.16±0<br>.34 | 0.26±<br>0.40 |      |
|       |        |    | Av.S. | 80±<br>12  | 13±<br>7.7  | <0.1        | 6.6±<br>4.0 | <0.5 | <0.1          | 0.23±<br>0.43 |      |
|       |        |    | Av.R. | 86±<br>4.7 | 9.6±<br>2.9 | <0.1        | 4.8±<br>1.7 | <0.5 | <0.1          | <0.1          |      |

49  
50  
51  
52  
53  
54  
55  
56  
57  
58  
59  
60  
61  
62  
63  
64  
65  
66  
67  
68  
69  
70  
71  
72

73 **Table S3.** Mineral contents (%wt) of samples from different locations (Loc.) Dyngjusandur (Dyn), Dyngjuvatn (Dvt), Landeyjarsandur (Lan), Mýrdalssandur (Mýr), Skaftarsandur  
74 (Ska), Mælifellsandur (Mæl) and Hagavatn (Hgv), Average Icelandic crust (Av.I.C.). V. G.: volcanic glass, An: anorthite, And: andesine, Di-Fe: Fe-diopside, Agt: augite, Qtz:  
75 quartz, Fo: forsterite, Hem: hematite, Mag: magnetite, Py: pyrite, M-Ca: mordenite-Ca, Anl: analcime, Wrk: wairakite.

| Latitude | Longitude | Sample number | Loc. | V.G. | Plagioclase |      | Pyroxene |      |      | Iron Oxides |      |      | Zeolites |      |      |      |
|----------|-----------|---------------|------|------|-------------|------|----------|------|------|-------------|------|------|----------|------|------|------|
|          |           |               |      |      | An          | And  | Di-Fe    | Agt  | Qtz  | Fo          | Hem  | Mag  | Py       | M-Ca | Anl  | Wrk  |
| 64,92    | -16,78    | R.S.C.        | Dyn  | 79   | 13          | <0.1 | <0.1     | 7.4  | <0.1 | <0.1        | <0.5 | <0.5 | <0.5     | <0.1 | <0.1 | <0.1 |
| 64,91    | -16,78    | 1             | Dyn  | 86   | 9.8         | <0.1 | <0.1     | 4.0  | <0.1 | <0.1        | <0.5 | <0.5 | <0.5     | <0.1 | <0.1 | <0.1 |
| 64,91    | -16,78    | 2             | Dyn  | 83   | 11          | <0.1 | <0.1     | 5.8  | <0.1 | <0.1        | <0.5 | <0.5 | <0.5     | <0.1 | <0.1 | <0.1 |
| 64,89    | -16,88    | 12            | Dyn  | 85   | 9.6         | <0.1 | <0.1     | 5.5  | <0.1 | <0.1        | <0.5 | <0.5 | <0.5     | <0.1 | <0.1 | <0.1 |
| 64,91    | -16,83    | 14            | Dyn  | 83   | 12          | <0.1 | <0.1     | 5.0  | <0.1 | <0.1        | <0.5 | <0.5 | <0.5     | <0.1 | <0.1 | <0.1 |
| 64,91    | -16,77    | 15            | Dyn  | 82   | 12          | <0.1 | <0.1     | 5.9  | <0.1 | <0.1        | <0.5 | <0.5 | <0.5     | <0.1 | 0.93 | <0.1 |
| 64,91    | -16,77    | 29            | Dyn  | 80   | 13          | <0.1 | <0.1     | 6.0  | <0.1 | <0.1        | <0.5 | <0.5 | <0.5     | <0.1 | <0.1 | <0.1 |
| 64,91    | -16,77    | 30            | Dyn  | 79   | 14          | <0.1 | <0.1     | 6.6  | <0.1 | <0.1        | <0.5 | <0.5 | <0.5     | <0.1 | <0.1 | <0.1 |
| 64,91    | -16,77    | 31            | Dyn  | 82   | 11          | <0.1 | <0.1     | 6.7  | <0.1 | <0.1        | <0.5 | <0.5 | <0.5     | <0.1 | <0.1 | <0.1 |
| 64,98    | -16,57    | 20            | Dvt  | 87   | 8.0         | <0.1 | <0.1     | 5.0  | <0.1 | <0.1        | <0.5 | <0.5 | <0.5     | <0.1 | <0.1 | <0.1 |
| 65,00    | -16,55    | 21            | Dvt  | 92   | 4.4         | <0.1 | <0.1     | 1.4  | <0.1 | <0.1        | <0.5 | <0.1 | <0.5     | <0.1 | 0.70 | <0.1 |
| 63,53    | -12,67    | 92            | Lan  | 35   | 48          | <0.1 | 14       | <0.1 | <0.1 | <0.1        | 1.3  | 1.9  | <0.5     | <0.1 | <0.1 | <0.1 |
| 63,56    | -12,72    | 93            | Lan  | 40   | 41          | <0.1 | <0.1     | 16   | 0.40 | <0.1        | <0.5 | <0.5 | <0.5     | 0.60 | 0.70 | <0.1 |
| 63,43    | -12,53    | 94            | Mýr  | 85   | 9.0         | <0.1 | <0.1     | 5.4  | 0.65 | <0.1        | <0.5 | <0.5 | <0.5     | <0.1 | <0.1 | <0.1 |
| 63,60    | -12,35    | 95            | Mýr  | 67   | 23          | <0.1 | <0.1     | 7.7  | 1.2  | <0.1        | <0.5 | 1.1  | <0.5     | <0.1 | <0.1 | <0.1 |

|       |        |     |             |           |           |            |             |             |               |              |      |      |      |      |               |               |
|-------|--------|-----|-------------|-----------|-----------|------------|-------------|-------------|---------------|--------------|------|------|------|------|---------------|---------------|
| 63,81 | -13,03 | 99  | Mýr         | 74        | 15        | <0.1       | <0.1        | 8.8         | 0.80          | <0.1         | <0.5 | 1.1  | <0.5 | <0.1 | <0.1          | <0.1          |
| 63,79 | -12,94 | 102 | Ska         | 67        | <0.1      | 11         | <0.1        | 13          | 1.8           | <0.1         | <0.5 | <0.5 | 1.2  | 1.2  | <0.1          | 4.4           |
| 63,82 | -12,89 | 103 | Mæl         | 80        | 11        | <0.1       | 7.5         | <0.1        | <0.1          | <0.1         | <0.5 | 1.1  | <0.5 | <0.1 | <0.1          | <0.1          |
| 63,68 | -13,78 | 104 | Mæl         | 78        | 15        | <0.1       | 6.1         | <0.1        | <0.1          | <0.1         | <0.5 | 0.86 | <0.5 | <0.1 | <0.1          | <0.1          |
| 63,67 | -13,93 | 105 | Mæl         | 84        | 11        | <0.1       | 5.1         | <0.1        | <0.1          | <0.1         | <0.5 | 0.80 | <0.5 | <0.1 | <0.1          | <0.1          |
| 64,46 | -14,30 | 106 | Hgv         | 10        | <0.1      | 52         | <0.1        | 31          | <0.1          | 6.2          | <0.5 | <0.5 | <0.5 | <0.1 | <0.1          | <0.1          |
| 64,45 | -14,31 | 107 | Hgv         | 28        | <0.1      | 43         | <0.1        | 25          | <0.1          | 4.0          | <0.5 | <0.5 | <0.5 | <0.1 | <0.1          | <0.1          |
| 64,46 | -14,86 | 108 | Hgv         | <0.1      | <0.1      | 65         | <0.1        | 31          | <0.1          | 3.9          | 0.5  | <0.5 | <0.5 | <0.1 | <0.1          | <0.1          |
|       |        |     | Av.l.<br>C. | 68±<br>26 | 15±<br>11 | 7.4±<br>19 | 1.4±3.<br>4 | 8.6±<br>9.0 | 0.21±<br>0.47 | 0.61<br>±1.7 | <0.5 | <0.5 | <0.5 | <0.1 | 0.11±<br>0.28 | 0.19±<br>0.92 |

76  
77  
78  
79  
80  
81  
82  
83  
84  
85  
86  
87



88 **Table S4.** Fe mode of occurrence of different samples along the Jökulsá á Fjöllum basin. R.S.C is the Random  
89 Sampling Composite sample, obtained after mixing an equal batch of each type of sample. The contents are in  
90 %wt for total Fe (FeT) and in % of FeT for the respective forms of occurrence. FeA: content of readily  
91 exchangeable Fe, FeD: Fe content from hematite, goethite and pyrite, FeM: Fe content from magnetite, FeS: Fe  
92 content from non Fe minerals as Fe-silicates and volcanic glass. \*Median Fe mode of occurrence extracted from  
93 González-Romero et al. (2023).

| Latitude | Longitude | Sample number | Type of sample | FeT (%wt) | FeA (% FeT) | FeD (% FeT) | FeM (% FeT) | FeS (% FeT) |
|----------|-----------|---------------|----------------|-----------|-------------|-------------|-------------|-------------|
| 64,91    | -16,78    | 1             | C              | 9.2       | 2.2         | 7.7         | 25          | 65          |
| 64,91    | -16,78    | 2             | C              | 9.7       | 0.75        | 1.4         | 12          | 86          |
| 64,84    | -16,98    | 9             | C              | 8.9       | 1.4         | 1.8         | 23          | 74          |
| 64,89    | -16,88    | 12            | C              | 9.6       | 0.79        | 2.2         | 14          | 83          |
| 64,91    | -16,83    | 14            | C              | 9.4       | 0.79        | 2.8         | 14          | 82          |
| 64,91    | -16,77    | 15            | C              | 9.4       | 1.3         | 3.8         | 22          | 73          |
| 65,23    | -16,19    | 26            | C              | 9.4       | 0.97        | 3.1         | 9.9         | 86          |
| 65,26    | -16,12    | 27            | C              | 10.1      | 1.1         | 3.4         | 8.7         | 87          |
| 64,91    | -16,77    | 29            | C              | 9.3       | 1.2         | 4.5         | 19          | 75          |
| 64,91    | -16,77    | 30            | C              | 9.3       | 1.6         | 4.4         | 23          | 71          |
| 64,91    | -16,77    | 31            | C              | 9.2       | 1.1         | 3.1         | 17          | 79          |
| 66,03    | -16,44    | 109           | C              | 10.2      | 1.7         | 3.1         | 11          | 84          |
| 66,09    | -16,48    | 110           | C              | 9.5       | 1.6         | 3.7         | 12          | 83          |
| 66,18    | -16,51    | 111           | C              | 10.2      | 1.6         | 4.5         | 11          | 83          |
| 64,92    | -16,78    | R.S.C         | C              | 9.0       | 1.3         | 2.9         | 19          | 77          |
| 64,91    | -16,78    | 3             | S              | 9.5       | 1.9         | 5.4         | 22          | 71          |
| 64,89    | -16,88    | 13            | S              | 8.9       | 1.5         | 1.5         | 27          | 70          |
| 64,91    | -16,77    | 16            | S              | 9.8       | 0.84        | 1.2         | 13          | 85          |
| 65,23    | -16,19    | 25            | S              | 10.1      | 1.1         | 1.9         | 11          | 86          |
| 65,26    | -16,12    | 28            | S              | 9.3       | 1.8         | 2.9         | 14          | 81          |
| 64,91    | -16,77    | 32            | S              | 9.7       | 0.83        | 1.3         | 0.42        | 97          |
| 64,91    | -16,77    | 33            | S              | 9.6       | 0.92        | 1.7         | 14          | 84          |
| 64,92    | -16,78    | R.S.C         | S              | 8.9       | 1.0         | 1.7         | 16          | 81          |
| 64,83    | -17,01    | 4             | R              | 9.7       | 0.88        | 1.6         | 21          | 77          |
| 64,83    | -17,01    | 6             | R              | 9.7       | 0.90        | 1.8         | 14          | 83          |

|       |        |    |                  |              |               |              |        |        |
|-------|--------|----|------------------|--------------|---------------|--------------|--------|--------|
| 64,84 | -16,98 | 10 | R                | 9.7          | 0.69          | 0.64         | 17     | 82     |
| 64,86 | -16,95 | 11 | R                | 9.6          | 0.69          | 0.73         | 18     | 81     |
| 64,91 | -16,77 | 17 | R                | 8.8          | 1.0           | 1.3          | 21     | 77     |
| 64,92 | -16,76 | 18 | R                | 9.6          | 0.72          | 1.0          | 16     | 83     |
| 64,95 | -16,55 | 19 | R                | 9.1          | 0.64          | 0.95         | 18     | 80     |
| 64,91 | -16,77 | 34 | R                | 8.8          | 1.3           | 1.3          | 16     | 81     |
|       |        |    | Average crust    | 9.5±0.3<br>9 | 1.3±0.3<br>9  | 3.5±1.5      | 16±5.4 | 79±6.5 |
|       |        |    | Average sediment | 9.5±0.4<br>3 | 1.2±0.4<br>4  | 2.2±1.4      | 15±7.8 | 82±8.7 |
|       |        |    | Average ripples  | 9.4±0.4<br>1 | 0.85±0.<br>22 | 1.2±0.4<br>1 | 18±2.4 | 80±2.4 |

94

95

96

97

98

99

100

101

102

103

104

105

106

107

108

109

110

111

112

113 **Table S5.** Fe mode of occurrence from different locations (Loc.) Dyngjusandur (Dyn), Dyngjuvatn (Dvt),  
 114 Landeyjarsandur (Lan), Mýrdalssandur (Mýr), Skaftarsandur (Ska), Mælifellsandur (Mæl) and Hagavatn (Hgv),  
 115 Average icelandic crust (Av.I.C.). The value of every mode of occurrence is in % of total Fe content. FeA: content  
 116 of readily exchangeable Fe, FeD: Fe content from hematite, goethite and pyrite, FeM: Fe content from  
 117 magnetite, FeS: Fe content from non Fe minerals as Fe-silicates and volcanic glass. The contents are in %wt for  
 118 FeT and as % of FeT for the respective forms of occurrence.

| Latitude | Longitude | Sample number |         | FeT (%wt) | FeA (% FeT) | FeD (% FeT) | FeM (% FeT) | FeS (% FeT) |
|----------|-----------|---------------|---------|-----------|-------------|-------------|-------------|-------------|
| 64,92    | -16,78    | R.S.C.        | Dyn     | 9.2       | 2.2         | 7.7         | 25          | 65          |
| 64,91    | -16,78    | 1             | Dyn     | 9.7       | 0.75        | 1.4         | 12          | 86          |
| 64,91    | -16,78    | 2             | Dyn     | 9.6       | 0.79        | 2.2         | 14          | 83          |
| 64,89    | -16,88    | 12            | Dyn     | 9.4       | 0.79        | 2.8         | 14          | 82          |
| 64,91    | -16,83    | 14            | Dyn     | 9.4       | 1.3         | 3.8         | 22          | 73          |
| 64,91    | -16,77    | 15            | Dyn     | 9.0       | 1.3         | 2.9         | 19          | 77          |
| 64,91    | -16,77    | 29            | Dyn     | 9.3       | 1.2         | 4.5         | 19          | 75          |
| 64,91    | -16,77    | 30            | Dyn     | 9.3       | 1.6         | 4.4         | 23          | 71          |
| 64,91    | -16,77    | 31            | Dyn     | 9.2       | 1.1         | 3.1         | 17          | 79          |
| 64,98    | -16,57    | 20            | Dvt     | 9.1       | 1.7         | 3.4         | 13          | 82          |
| 65,00    | -16,55    | 21            | Dvt     | 5.5       | 2.6         | 11          | 7.6         | 79          |
| 63,53    | -12,67    | 92            | Lan     | 9.3       | 1.4         | 5.8         | 7.2         | 86          |
| 63,56    | -12,72    | 93            | Lan     | 8.5       | 2.3         | 8.7         | 12          | 77          |
| 63,43    | -12,53    | 94            | Mýr     | 10.7      | 1.4         | 2.4         | 18          | 78          |
| 63,60    | -12,35    | 95            | Mýr     | 10.0      | 1.8         | 4.8         | 15          | 78          |
| 63,81    | -13,03    | 99            | Mýr     | 10.8      | 1.1         | 2.5         | 14          | 82          |
| 63,79    | -12,94    | 102           | Ska     | 9.4       | 2.6         | 4.4         | 13          | 80          |
| 63,82    | -12,89    | 103           | Mæl     | 11.6      | 0.88        | 2.4         | 7.8         | 89          |
| 63,68    | -13,78    | 104           | Mæl     | 10.7      | 1.3         | 2.8         | 15          | 81          |
| 63,67    | -13,93    | 105           | Mæl     | 11.3      | 1.8         | 3.9         | 14          | 80          |
| 64,46    | -14,30    | 106           | Hgv     | 8.1       | 1.6         | 8.0         | 10          | 80          |
| 64,45    | -14,31    | 107           | Hgv     | 8.3       | 3.1         | 12          | 9.4         | 76          |
| 64,46    | -14,86    | 108           | Hgv     | 5.6       | 3.4         | 11          | 14          | 71          |
|          |           |               | Av.I.C. | 9.3±1.5   | 1.6±0.74    | 5.0±3.1     | 15±4.8      | 79±5.4      |
